# Supplementary material for: Fabrication of Rapid Electrical Pulse-Based Biosensor Consisting of Truncated DNA Aptamer for Zika Virus Envelope Protein Detection in Clinical Samples
Source: Materials (Basel). 2023 Mar 15;16(6):2355. doi: 10.3390/ma16062355 (PMC10054023; doi:10.3390/ma16062355)
Supplement: Supplementary file 1 [file materials-16-02355-s001.zip › materials-2200225-supplementary.pdf]

Supporting Information

Fabrication of rapid electrical pulse-based biosensor consisted of truncated DNA aptamer for zika virus detection in clinical sample

Moonbong Jang<sup>1,†</sup>, Myoungro Lee<sup>1,†</sup>, Hiesang Sohn<sup>1</sup>, Chulhwan Park<sup>1</sup>, Taek Lee<sup>1,2,\*</sup>

a)

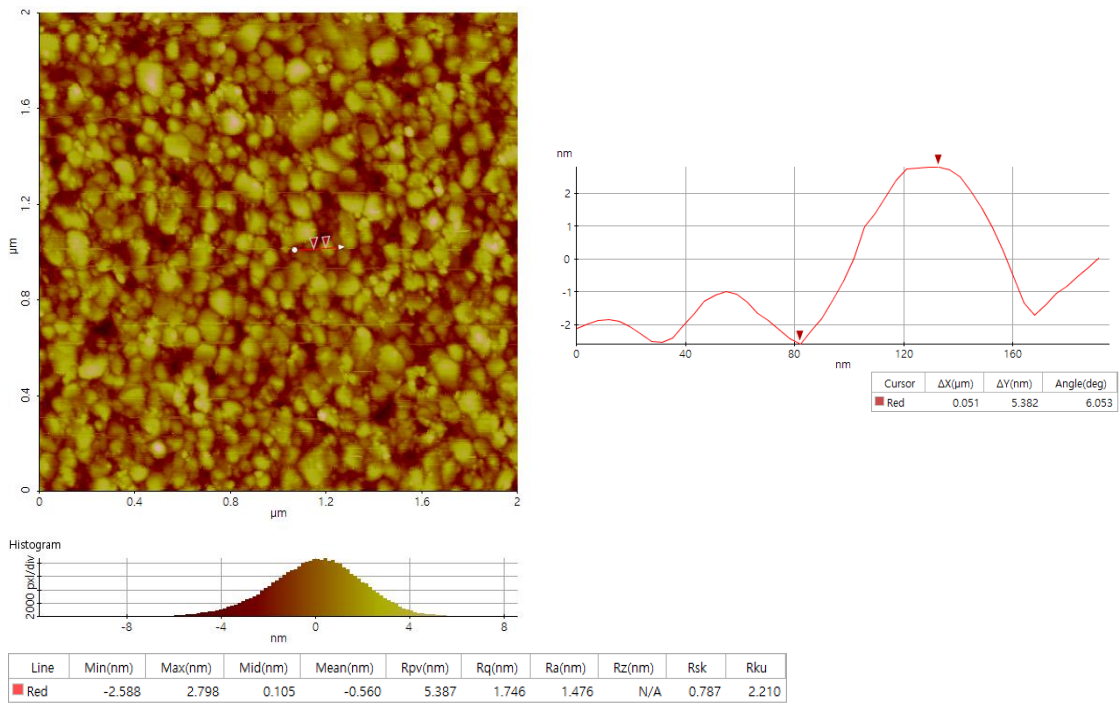

b)

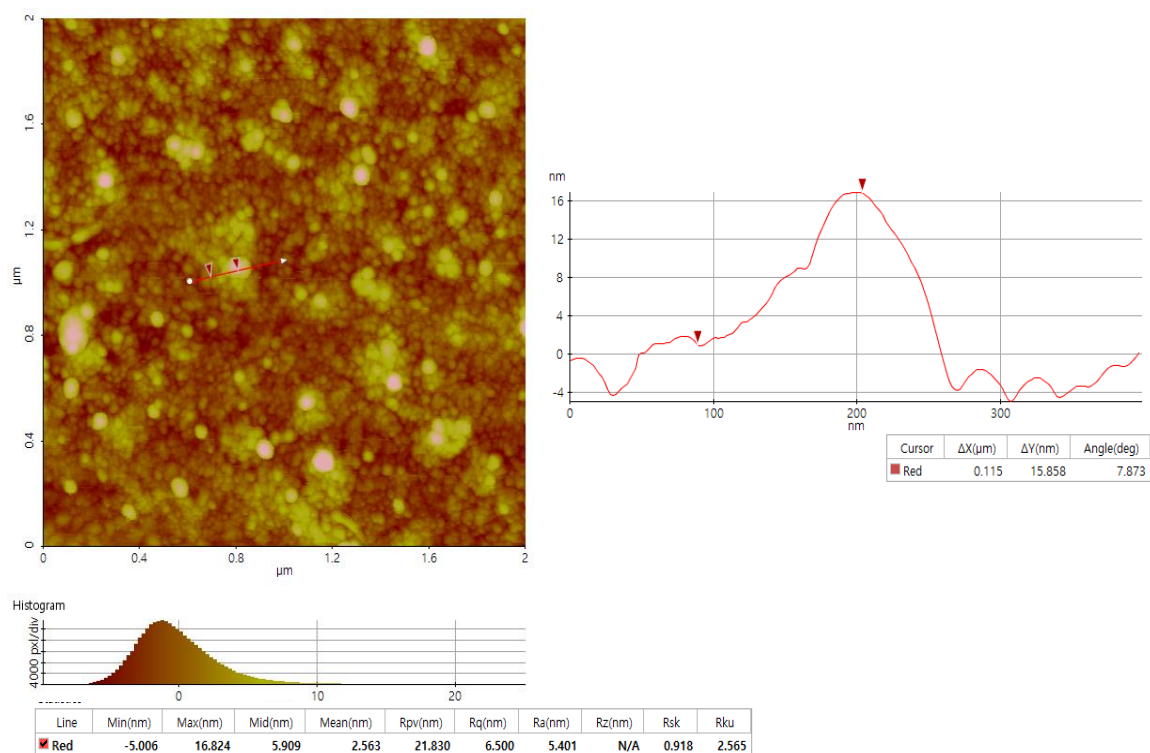

c)

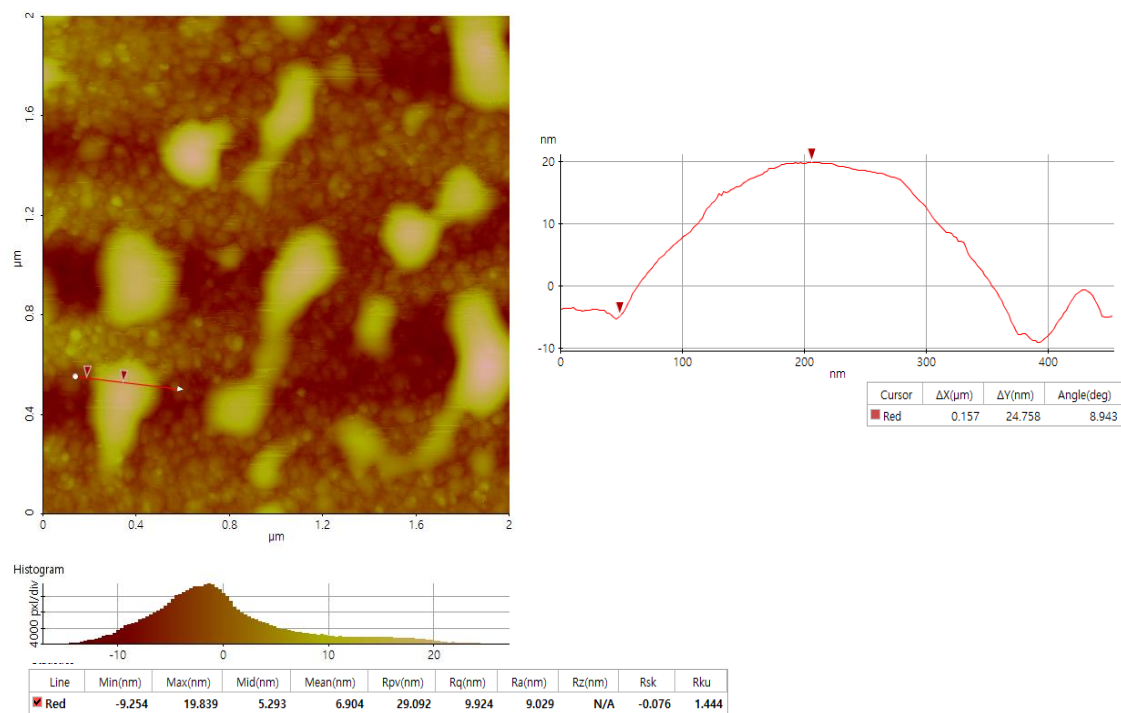

**Figure. S1.** (a) Vertical analysis of Au substrate, (b) Vertical analysis of aptamer on the Au substrate, (c) Vertical analysis of aptamer and Zika envelope conjugate on the Au.

**Table. S1.** Signal change according to drying time after immobilization of truncated aptamer-Zika envelope protein.

| Time    | 0 min                | 1 min                | 5 min                | 10 min               | 10 min               | 30 min               |
|---------|----------------------|----------------------|----------------------|----------------------|----------------------|----------------------|
| Voltage | 0.92558 ±<br>0.02463 | 0.91969 ±<br>0.01541 | 0.91540 ±<br>0.01609 | 0.85085 ±<br>0.01779 | 0.35643 ±<br>0.01735 | 0.33775 ±<br>0.01779 |

**Table. S2.** Measured values after 10x cascade dilution to select the optimal truncated aptamer concentration.

| Molarity | 10 uM                | 1 uM                 | 100 nM               | 10 nM                | 1 nM                 | 100 pM               |
|----------|----------------------|----------------------|----------------------|----------------------|----------------------|----------------------|
| Voltage  | 0.60201 ±<br>0.01849 | 0.93367 ±<br>0.02096 | 0.51256 ±<br>0.01911 | 0.46901 ±<br>0.02328 | 0.44891 ±<br>0.02772 | 0.41206 ±<br>0.05707 |

**Table. S3.** The measurements result from various solutions to select the optimal buffer.

| Buffer  | KCl                  | NaCl                 | HEPES                | PBS                  |
|---------|----------------------|----------------------|----------------------|----------------------|
| Voltage | 0.91942 ±<br>0.02463 | 0.73695 ±<br>0.01541 | 0.08174 ±<br>0.00928 | 0.03089 ±<br>0.00506 |

**Table. S4.** The measurement result of signal change according to the immobilized process of samples in the electrode.

| Measurement conditions | Bare                 | Aptamer              | Zika Protein         |
|------------------------|----------------------|----------------------|----------------------|
| Voltage                | 0.99302 ±<br>0.07119 | 0.49832 ±<br>0.00101 | 0.70537 ±<br>0.03351 |

**Table. S5.** The measurement result of ACEF and self-assembly in the immobilization phase of Zika envelope protein at 1uM and 0.1uM concentrations.

| immobilization condition | 1uM ACEF             | 0.1uM ACEF           | 1uM                  | 0.1uM                |
|--------------------------|----------------------|----------------------|----------------------|----------------------|
| Voltage                  | 0.91942 ±<br>0.02463 | 0.73695 ±<br>0.01541 | 0.08174 ±<br>0.00928 | 0.03089 ±<br>0.00506 |

**Table. S6.** Results of concentration-specific signal measurements of Zika envelope protein diluted in DIW on designed electrodes.

| Concentration of Zika envelope protein in DIW | 10 pM     | 100 pM    | 1 nM      | 10 nM     | 100 nM    | 1 uM      |
|-----------------------------------------------|-----------|-----------|-----------|-----------|-----------|-----------|
| Voltage                                       | 0.95273 ± | 0.87616 ± | 0.80818 ± | 0.72197 ± | 0.66939 ± | 0.60977 ± |
|                                               | 0.06910   | 0.06604   | 0.05508   | 0.04186   | 0.05986   | 0.06981   |

**Table. S7.** Results of concentration-specific signal measurements of Zika envelope protein diluted in 10% human serum on designed electrodes.

| Concentration of Zika envelope protein in 10% human serum | 10 pM     | 100 pM    | 1 nM      | 10 nM     | 100 nM    | 1 uM      |
|-----------------------------------------------------------|-----------|-----------|-----------|-----------|-----------|-----------|
| Voltage                                                   | 0.91108 ± | 0.85186 ± | 0.80819 ± | 0.71641 ± | 0.63582 ± | 0.56750 ± |
|                                                           | 0.03324   | 0.03144   | 0.04066   | 0.03632   | 0.03713   | 0.02657   |

**Table. S8.** The measurement result of the selectivity of Zika envelope protein with bio-derived materials and other virus proteins in the designed electrodes.

| Types of immobilizing substances | Zika envelope protein | BSA       | Fibrinogen | Myoglobin | Hemoglobin | Covid spike protein | Influenza A (H1N1) |
|----------------------------------|-----------------------|-----------|------------|-----------|------------|---------------------|--------------------|
| Voltage                          | 0.92558 ±             | 0.40531 ± | 0.36075 ±  | 0.37656 ± | 0.39811 ±  | 0.42585 ±           | 0.45430 ±          |
|                                  | 0.02464               | 0.01541   | 0.01736    | 0.01780   | 0.01609    | 0.01614             | 0.01856            |
